1 Metabolic resource overlap impacts on the competition of  
2 phyllosphere bacteria

3 Rudolf O. Schlechter<sup>1,2,3,4\*</sup>, Evan J. Kear<sup>2</sup>, Michał Bernach<sup>1,2,3,5</sup>, Daniela M. Remus<sup>6</sup>, and Mitja N. P.  
4 Remus-Emsermann<sup>1,2,3,4\*</sup>

5

6 <sup>1</sup> Institute of Microbiology and Dahlem Centre of Plant Sciences, Department of Biology, Chemistry,  
7 Pharmacy, Freie Universität Berlin, Berlin, Germany.

8 <sup>2</sup> School of Biological Sciences, University of Canterbury, Christchurch 8011, New Zealand.

9 <sup>3</sup> Biomolecular Interaction Centre, University of Canterbury, Christchurch 8011, New Zealand.

10 <sup>4</sup> Bioprotection Research Core, University of Canterbury, Christchurch 8011, New Zealand.

11 <sup>5</sup> Department of Electrical and Computer Engineering, University of Canterbury, Christchurch 8011,  
12 New Zealand.

13 <sup>6</sup> Protein Science and Engineering, Callaghan Innovation, School of Biological Sciences, University of  
14 Canterbury, Christchurch, New Zealand.

15

16 **\*Corresponding authors:** Rudolf O. Schlechter, [r.schlechter.jahn@fu-berlin.de](mailto:r.schlechter.jahn@fu-berlin.de) and Mitja N. P.  
17 Remus-Emsermann, [m.remus-emsermann@fu-berlin.de](mailto:m.remus-emsermann@fu-berlin.de)

18 **Keywords:** Bacterial fitness, Leaf surface, Epiphytes, Community assembly, Single cells, Plant-  
19 microbe interactions, Reproductive success

## 20 ABSTRACT

21 The phyllosphere is densely colonised by rich microbial communities, despite sparse and  
22 heterogeneously distributed resources. The limitation of resources is expected to drive bacterial  
23 competition resulting in exclusion or coexistence based on fitness differences and resource overlap  
24 between individual colonisers. We studied the impact of resource competition by determining the effects  
25 of different bacterial colonisers on the growth of the model epiphyte *Pantoea eucalypti* 299R (Pe299R).  
26 Resource overlap was predicted based on genome-scale metabolic modelling. By combining results of  
27 metabolic modelling and pairwise competitions in the *Arabidopsis thaliana* phyllosphere and *in vitro*, we  
28 found that ten resources sufficed to explain fitness of Pe299R. An effect of both resource overlap and  
29 phylogenetic relationships was found on competition outcomes *in vitro* as well as in the phyllosphere.  
30 However, effects of resource competition were much weaker in the phyllosphere when compared to *in*  
31 *vitro* experiments. When investigating growth dynamics and reproductive success at the single-cell  
32 resolution, resource overlap and phylogenetic relationships are only weakly correlated with epiphytic  
33 Pe299R reproductive success, indicating that the leaf's spatial heterogeneity mitigates resource  
34 competition. Although the correlation is weak, the presence of competitors led to the development of  
35 Pe299R subpopulations that experienced different life histories and cell divisions. Surprisingly, in some  
36 *in planta* competitions, Pe299R benefitted from the presence of epiphytes despite high resource overlap  
37 to the competitor strain suggesting other factors having stronger effects than resource competition. This  
38 study provides fundamental insights into how bacterial communities are shaped in heterogeneous  
39 environments and provides a framework to predict competition outcomes.

## 40 INTRODUCTION

41 For bacteria, the leaf surface, i.e., the phyllosphere, is a challenging environment where resources are  
42 limited and heterogeneously distributed [1, 2]. However, leaves support bacterial populations of up to  
43  $10^7$  CFU per gram of leaf [3]. The number of CFU is impacted by the ability of bacteria to successfully  
44 colonise the heterogeneously distributed microenvironments on leaves. These microenvironments  
45 thereby influence local interactions and spatial structuring of bacterial communities [4–7].

46 Microbial communities exhibit intra- and inter-kingdom co-occurrence networks that are shaped and  
47 stabilised by priority effects and/or keystone microbial species [8, 9]. The interactions in these networks  
48 range from beneficial, neutral, to detrimental, resulting in increased, neutral, or decreased population  
49 densities, for at least one of the involved parties, compared to their monoculture [10]. Cooperative or  
50 beneficial microbial interactions include cross-feeding, biofilm formation, and cell communication; while  
51 competitive or detrimental interactions can be resource competition, contact-dependent antagonism,  
52 and secretion of toxic compounds [11]. Competition results in either exclusion or coexistence depending  
53 on the differences in the species' niches and their fitness in an environment [12]. Competitive exclusion  
54 is driven by mechanisms that decrease niche differences and increase fitness differences between  
55 competing species. Resource use and preference are an important niche axis for a species, and the  
56 overlap or similarity with other species is a factor that balances coexistence and competitive exclusion  
57 through establishing a level of niche differentiation with others [13].

58 In the phyllosphere, a large number of bacterial interactions in a community context were shown to be  
59 negative [14]. The most parsimonious explanation for the negative interactions is the competition for  
60 resources and space, as secretion of antimicrobial compounds appears to be restricted to only a limited  
61 number of bacterial taxa in the phyllosphere [15]. Replacement series experiments revealed that pairs  
62 of near-isogenic epiphytic bacterial strains with high resource overlap exhibited a strong negative impact  
63 on each other's population size on bean leaves [16]. By contrast, species pairs with a lower resource  
64 overlap resulted in larger population sizes than expected [16, 17]. However, this approach is not without  
65 its flaws, as it failed to predict competition outcomes between leaf-associated bacteria and a bacterial  
66 phytopathogen [18]. A challenge in defining a resource overlap is the lack of information of resource  
67 availability, use, and preference of a species in a specific environment. Genome-scale metabolic

68 modelling allows for the study of the metabolic capabilities and nutrient requirements of members within  
69 microbial communities in defined growth conditions. Metabolic and community modelling has previously  
70 been used in an ecological context to understand the role of metabolic exchange in communities [19],  
71 the identifications of keystone species [20], and to define resource overlaps and cross-feeding  
72 potentials based on growth requirements [21–23].

73 As the phyllosphere is highly heterogeneous, ‘coarse-grained’ investigations, such as those considering  
74 whole leaves or plants as the units of investigation, are not suited to study local interactions of leaf-  
75 associated bacteria. Therefore, to better understand bacterial growth dynamics in the phyllosphere, the  
76 micrometre or the single-cell scale must be the resolution of investigation, as every cell may experience  
77 a different fate such as microenvironments with different qualities and quantities of nutrients, or  
78 competitors [2, 3]. The intimate proximity of bacterial cells should thereby directly impact on community  
79 dynamics and short-distance interactions [3, 24, 25].

80 The CUSPER bioreporter (“repsuc” read backwards, from “reproductive success”), was developed in  
81 the epiphytic strain *Pantoea eucalypti* 299R (abb. Pe299R, syn. *Pantoea agglomerans* 299R, *Erwinia*  
82 *herbicola* 299R). Pe299R was originally isolated from a healthy Bartlett pear leaf and has been used in  
83 numerous studies since then to understand bacterial physiology and ecology in the phyllosphere [2, 5,  
84 26–29]. Pe299R is part of the order Enterobacterales and the family *Erwiniaceae*. It is a copiotroph,  
85 utilises a wide range of nutrients, and grows optimally between 28 and 37°C [17]. CUSPER reports on  
86 the number of divisions of individual cells from an initial population based on the dilution of a green  
87 fluorescent protein upon cell division and without *de novo* synthesis, and it has shown that Pe299R  
88 experience high variations of reproductive success in the phyllosphere [30, 31]. Due to the  
89 heterogeneously distributed and limited resources on leaves, the reproductive success of a bacterial  
90 cell depends on the local habitability. Consequently, it could be demonstrated that leaves that were pre-  
91 colonised with a near-isogenic Pe299R strain reduced the reproductive success of CUSPER bioreporter  
92 cells proportional to the pre-coloniser density [32]. However, interspecific competitions at the single-cell  
93 resolution in the phyllosphere have not been explored in such detail.

94 Here, we used genome-scale metabolic modelling to explain competition outcomes in defined growth  
95 conditions and in the phyllosphere for phylogenetically diverse leaf-associated bacterial isolates.  
96 Resource overlap was determined by metabolic modelling and expected to increase competition,

97 leading to negative impacts on bacterial growth *in vitro* and *in planta*. To that end, the epiphyte *Pantoea*  
98 *eucalypti* 299R (Pe299R) was used as focal strain and challenged with six different phyllosphere-  
99 associated bacteria in pairwise competition experiments in different environmental contexts and scales.

## 100 MATERIALS AND METHODS

### 101 Bacterial strains and growth conditions

102 *Pantoea eucalypti* 299R (Pe299R) and representative epiphytic bacterial strains used in this study are  
103 listed in Table 1. Pe299R was used to construct the constitutively red fluorescent protein (mScarlet-)-  
104 producing strain Pe299R::mSc, and was also the parental strain of the CUSPER bioreporter strain  
105 Pe299R<sub>CUSPER</sub> (Pe299R::mSc (pProbe\_CUSPER)), which harbours an additional IPTG-inducible green-  
106 fluorescent protein gene (Supplemental Materials and Methods). Bacteria were routinely grown on  
107 Reasoner's 2a agar or broth (R2A, HiMedia, India) at 30°C. Minimal media (MM) was used to evaluate  
108 growth and competition for defined carbon sources. Minimal media was composed of 1.62 g L<sup>-1</sup> NH<sub>4</sub>Cl,  
109 0.2 g L<sup>-1</sup> MgSO<sub>4</sub>, 1.59 g L<sup>-1</sup> K<sub>2</sub>HPO<sub>4</sub>, 1.8 g L<sup>-1</sup> NaH<sub>2</sub>PO<sub>4</sub>·2H<sub>2</sub>O, with the following trace elements:  
110 15 mg L<sup>-1</sup> Na<sub>2</sub>EDTA·H<sub>2</sub>O, 4.5 mg L<sup>-1</sup> ZnSO<sub>4</sub>·7H<sub>2</sub>O, 3 mg L<sup>-1</sup> CoCl<sub>2</sub>·6H<sub>2</sub>O, 0.6 mg L<sup>-1</sup> MnCl<sub>2</sub>, 1 mg L<sup>-1</sup>  
111 H<sub>3</sub>BO<sub>3</sub>, 3.0 mg L<sup>-1</sup> CaCl<sub>2</sub>, 0.4 mg L<sup>-1</sup> Na<sub>2</sub>MoO<sub>4</sub>·2H<sub>2</sub>O, 3 mg L<sup>-1</sup> FeSO<sub>4</sub>·7H<sub>2</sub>O, and 0.3 mg L<sup>-1</sup>  
112 CuSO<sub>4</sub>·5H<sub>2</sub>O [33]. Carbon sources used were glucose, fructose, sorbitol, malate, and methanol for  
113 determining carbon utilisation profiles and *in vitro* competition assays.

### 114 Phylogeny

115 A phylogenetic tree for the seven phyllosphere-associated strains was constructed based on a multiple  
116 sequence alignment of a set of concatenated 31 single-copy genes [34]. Alignment was done with  
117 MAFFT, and a phylogenetic tree was then inferred using UPGMA with a Jukes-Cantor model.  
118 Concatenation, alignment, and tree inference were performed in Geneious Prime 2022.2.2  
119 (<https://www.geneious.com>). Newick files were exported into R to retrieve a phylogenetic distance  
120 matrix based on branch lengths between strains and Pe299R, using the package *ape* [35].

### 121 *In vitro* growth assays

122 Each strain was grown at 30°C in R2A broth until the late stationary phase. Cells were then harvested  
123 by centrifugation at 2,000 × *g* for 5 min, washed twice in phosphate buffer saline (PBS, 0.2 g L<sup>-1</sup> NaCl,

124 1.44 g L<sup>-1</sup> Na<sub>2</sub>HPO<sub>4</sub> and 0.24 g L<sup>-1</sup> KH<sub>2</sub>PO<sub>4</sub>), and resuspended in MM to an optical density at 600 nm  
125 (OD<sub>600</sub>) of 0.5. Afterwards, 20 µL of bacterial suspension were added to 180 µL of MM supplemented  
126 with a carbon source in flat bottom 96-well microtiter plates (Costar®, Corning®, NY, USA) with four  
127 technical replicates per condition. Carbon utilisation profiles for each species was determined by  
128 supplementing MM with a final concentration of 0.2% w/v of a sole carbon source (glucose, fructose,  
129 sorbitol, or malate), or 0.2% v/v of methanol. Minimal medium without added carbon source was used  
130 as a negative control. The microtiter plates were sealed with a breathable membrane (4ti-0516/96; gas  
131 permeability of 0.6 m<sup>3</sup> m<sup>-2</sup> day<sup>-1</sup> and water loss of 1 g m<sup>-2</sup> day<sup>-1</sup>; Brooks Life Sciences, UK), and  
132 incubated at 30°C with shaking. Optical density was measured in a FLUOstar Omega microplate reader  
133 (BMG Labtech Ltd., UK) for up to 5 days in 24 h intervals on the same batch culture. For each  
134 measurement, ten measurements in different positions of each well were recorded and averaged. The  
135 experiments were conducted twice independently. Growth curves of each strain in each growth  
136 condition were used to determine growth rate ( $\mu$ ), carrying capacity (K), and area under the curve  
137 (AUC), using the R package *growthcurver* [36]. These values were used to create a Euclidean distance  
138 matrix between species, in which the distance between Pe299R and a second species was used as a  
139 proxy of carbon utilisation dissimilarity.

## 140 Construction of genome-scale metabolic and community models

141 Genomes were retrieved from the PATRIC database, and the annotation files were used to create either  
142 individual metabolic models or 2-spp. communities, in which Pe299R was always present, in CarveMe  
143 [37]. Models were gap filled using a minimal media composition with (1) carbon sources used for carbon  
144 utilisation profiles, or (2) carbon sources detected in *Arabidopsis thaliana* leaves [38, 39]. An index of  
145 metabolic resource overlap (MRO) was calculated for each 2-spp. community model using the ‘species  
146 metabolic interaction analysis’ (SMETANA) modelling approach developed by Zelezniak *et al.* (2015)  
147 [22]. MRO was calculated based on a *in silico* media composition that emulates the growth media tested  
148 empirically (Table S1). Similar to the *in vitro* experiments, the composition of the *in silico* media included  
149 glucose, fructose, malate, sorbitol, and methanol (M5C). To determine the MRO between pair of species  
150 in the phyllosphere, five different media compositions were specified *a priori* based on a range of carbon  
151 sources identified in *Arabidopsis thaliana* leaves [38, 39], as the composition of the available resources  
152 in the phyllosphere is not yet well defined (L8C, L10C, L13C, L18C, and L26C), detailed in Table S1

153 [38, 39]. Methanol was included in every media composition, as it is detected on leaf surfaces and is a  
154 relevant source of carbon for phyllosphere-associated methylotrophs [40, 41]. Construction of metabolic  
155 models and MRO were performed using the High-Performance Computer at ZEDAT, Freie Universität  
156 Berlin [42].

## 157 Competition for carbon sources

158 Competition assays were performed in MM supplemented with mixed carbon sources (MM<sub>5xC</sub>),  
159 composed of a total 0.125% w/v of glucose, fructose, sorbitol, malate, and methanol (0.025% w/v  
160 glucose, 0.025% w/v fructose, 0.025% w/v malate, 0.025% w/v sorbitol, and 0.025% v/v methanol). The  
161 red fluorescent Pe299R::mSc strain was competed against individual non-fluorescent bacteria by  
162 mixing both strains in a 1:1 OD<sub>600</sub> ratio, as described previously [43]. Briefly, flat bottom 96-well  
163 microtiter plates (Costar®, Corning®, NY, USA) were seeded with 200 µL MM<sub>5xC</sub> containing a defined  
164 mixed bacterial suspension (final OD<sub>600</sub> = 0.05, three technical replicates). The microplate was sealed  
165 with a breathable membrane (4ti-0516/96; gas permeability of 0.6 m<sup>3</sup> m<sup>-2</sup> day<sup>-1</sup> and water loss of 1 g  
166 m<sup>-2</sup> day<sup>-1</sup>; Brooks Life Sciences, UK), incubated at 30°C with shaking in a microplate reader, and the  
167 red fluorescence of Pe299R::mSc was measured every 5 min for 20 h using an excitation filter at 584  
168 nm and an emission filter at 620-10 nm. Growth parameters from fluorescence growth curves ( $\mu_{RFU}$ ,  
169  $K_{RFU}$ ,  $AUC_{RFU}$ ) were determined in *growthcurver*. A competitive ability score based on Chesson's  
170 framework of Coexistence Theory [44] was calculated as in Eq. 1.

$$171 \quad \text{Competitive score} = \frac{\mu_i - 1}{\sqrt{a_{ii}a_{ij}}} \quad (\text{Equation 1})$$

172 Where  $\mu_i$  is the growth rate of Pe299R::mSc in monoculture,  $a_{ii}$  is the competition coefficient of  
173 Pe299R::mSc when a near-isogenic Pe299R strain is present (intraspecific competition), and  $a_{ij}$  is the  
174 competition coefficient of Pe299R::mSc when a different strain is present (interspecific competition).  
175 Competition coefficients were calculated as the reciprocal of the corresponding K [45]. For simplicity,  
176 competitive ability scores were rescaled and centred to zero (z-score).



## 177 Plant growth

178 *Arabidopsis* seeds (*Arabidopsis thaliana* Col-0) were surface-sterilised in a solution containing 50% v/v  
179 ethanol and 6% v/v H<sub>2</sub>O<sub>2</sub> for 90 s, then thoroughly washed three times with sterile distilled water. Before  
180 sowing, seeds were stratified in sterile water at 4°C in the dark for at least 2 days. Four seeds were  
181 sown aseptically in tissue-culture vessels (Magenta™ GA-7, Magenta LLC., IL, USA) containing 50 mL  
182 of ½ Murashige & Skoog (MS; Duchefa, The Netherlands) agar media (1.0% w/v, pH 5.9) in sterile  
183 conditions. For gas exchange, the lids of the Magenta GA-7 tissue-culture boxes featured four 1 cm  
184 diameter holes that were covered with two layers of 3M Micropore™ tape [46]. Plants were grown in a  
185 Conviron A1000 plant growth chamber at 22°C, 80% relative humidity and short day photoperiod (11 h  
186 day cycles, light intensity ~120-150 μE m<sup>-2</sup> s<sup>-1</sup>).

## 187 Plant inoculation

188 For plant inoculation, an exponentially growing Pe299R<sub>CUSPER</sub> culture in lysogeny broth (LB; HiMedia,  
189 India) supplemented with 50 μg mL<sup>-1</sup> kanamycin was induced with 1 mM isopropyl beta-D-1-  
190 thiogalactopyranoside (IPTG), as described in detail in Supplemental Material and Methods. Competitor  
191 strains were grown on R2A agar plates for 2–5 days, depending on the strain, and a loop of bacteria  
192 was resuspended and washed twice in PBS. The IPTG-induced Pe299R<sub>CUSPER</sub> and the bacterial  
193 suspensions were mixed in a 1:1 ratio and adjusted to a final OD<sub>600nm</sub> of 0.005. Four-week-old  
194 *arabidopsis* plants were inoculated with 200 μL of the bacterial mix per box using a sterile airbrush  
195 (KKmoon Airbrush Model T130A). Plants were harvested at 0, 24, 36, and 48 hours post-inoculation  
196 (hpi) by cutting the complete leaf rosette from the roots using sterile scissors and scalpel, and  
197 transferring the plant into a 1.7-mL microcentrifuge tube. Four individual plants were used per condition.  
198 After the fresh weight of each plant was determined, 1 mL PBS with 0.02% v/v Silwet® L-77 was added.  
199 Samples were shaken in a bead mill homogenizer (Omni Bead Ruptor 24, Omni International, GA, USA)  
200 for two cycles of 5 min at a speed of 2.6 m s<sup>-1</sup>, and sonicated for 5 min (Easy 30 H, Elmasonic, Elma  
201 Schmidbauer GmbH, Germany).

202 Leaf washes were plated onto R2A (total bacterial density) and R2A supplemented with 15 μg mL<sup>-1</sup>  
203 gentamicin (Pe299R<sub>CUSPER</sub> population), and CFU were determined by serial dilutions and normalised

204 by the corresponding plant fresh weight (CFU gFW<sup>-1</sup>). Growth curve parameters from CFU of Pe299R  
205 ( $\mu$ , K) were used to calculate the competitive ability of an epiphytic strain against Pe299R, as previously  
206 described (Eq. 1). The remaining supernatants were transferred into a sterile 1.7-mL microcentrifuge  
207 tube and centrifuged at 15,000  $\times$  g for 10 min at 4°C to collect cells for microscopy. Cells were  
208 resuspended and fixed in 100  $\mu$ L of fixative solution (4% w/v paraformaldehyde –PFA– in PBS)  
209 overnight at 4°C. After this period, cells were washed twice in PBS and resuspended in 20  $\mu$ L PBS.  
210 Then, one volume of 96% v/v ethanol was added to the samples. Samples were stored at -20°C until  
211 further analysis.

## 212 Microscopy

213 Cells recovered from leaves after 0, 24, and 36 hpi were mounted on microscopy slides coated with  
214 0.1% w/v gelatine. Images were acquired on a AxioImager.M1 fluorescent widefield microscope (Zeiss)  
215 at 1000 $\times$  magnification (EC Plan-Neofluar 100 $\times$ /1.30 Ph3 Oil M27 objective) equipped with the Zeiss  
216 filter sets 38HE (BP 470/40-FT 495-BP 525/50) and 43HE (BP 550/25-FT 570-BP 605/70), an Axiocam  
217 506 (Zeiss), and the software Zen 2.3 (Zeiss). At least 100 cells were acquired per biological replicate  
218 in three different channels: green (38HE filter set), red (43HE filter set), and phase contrast.

## 219 Image analysis

220 Images were analysed in FIJI/ImageJ v. 2.0.0-rc-69/1.52s [47]. As Pe299R<sub>CUSPER</sub> constitutively  
221 expresses mScarlet-I, the red fluorescent channel was used as a mask to select individual cells, using  
222 the thresholding method “intermodes” and converted into a binary mask object. Only particles in a size  
223 range of 0.5–2.5  $\mu$ m were considered, excluding cells on the edges of the field of view. All objects were  
224 manually inspected using the phase contrast images to corroborate the selection of bacterial cells, and  
225 to exclude false positive red fluorescent particles. The mask was then used to determine green  
226 fluorescence of Pe299R<sub>CUSPER</sub> cells in the green-fluorescent channel to calculate the reproductive  
227 success (RS) of single cells. In addition, background fluorescence was measured by sampling a random  
228 section of background area in each fluorescent image [2].

## 229 Estimation of single-cell reproductive success

230 The RS of the Pe299R<sub>CUSPER</sub> bioreporter is calculated as the number of divisions a GFP-loaded cell  
231 underwent after arrival to a new environment. This estimation is based on the dilution of the green-  
232 fluorescent signal after cell division, as *de novo* biosynthesis of GFP is transcriptionally repressed [30].  
233 The RS of Pe299R<sub>CUSPER</sub> cell at a time  $t$  was estimated from background-corrected fluorescence  
234 measurements by subtracting the mean background fluorescence from the mean fluorescence intensity  
235 of each cell in each field of view. Then, the reproductive success of a cell  $n$  at time  $t$  ( $RS_{n,t}$ )—number  
236 of divisions of an immigrant cell since its arrival to a new environment—was calculated as

$$237 \quad RS_{n,t} = \log_2 \left( \frac{\bar{x}_0}{x_{n,t}} \right) \quad (\text{Equation 2})$$

238 Where  $\bar{x}_0$  is the mean intensity of the cell population at time zero, and  $x_{n,t}$  the fluorescence intensity of  
239 a single cell  $n$  at time  $t$  [31].

240 As the Pe299R<sub>CUSPER</sub> bioreporter decreases in intensity upon each cell division, the RS value from the  
241 background intensity measurements in the green-fluorescent channel was calculated to define a limit  
242 of detection (LOD) for Pe299R<sub>CUSPER</sub>. The LOD was defined as the RS value that has a 5% probability  
243 of being background noise. Consequently, calculated values of RS for single cells above this threshold  
244 were grouped, as the number of generations that a cell with low fluorescent intensity underwent cannot  
245 be further estimated. The distribution of RS from the initial cell population was determined as a relative  
246 fraction of Pe299R<sub>CUSPER</sub> cells from the total observed population, by binning cells into subpopulations  
247 with different RS values: RS<sub>0</sub>: RS < 0.5; RS<sub>1</sub>: 0.5 ≤ RS < 1.5; RS<sub>2</sub>: 1.5 ≤ RS < 2.5; RS<sub>3</sub>: 2.5 ≤ RS < 3.5;  
248 RS<sub>4</sub>: 3.5 ≤ RS < 4.5; RS<sub>>4</sub>: RS ≥ 4.5. Non-Metric Multidimensional Scaling (NMDS) and Permutational  
249 Multivariate Analysis of Variance (PERMANOVA) with Bray-Curtis dissimilarities was selected to  
250 evaluate the variation of a Pe299R<sub>CUSPER</sub> population (as relative fractions) explained by multivariate  
251 data (i.e., time of sampling and presence of an epiphyte). Bray-Curtis dissimilarity matrix and  
252 PERMANOVA with 999 permutations were performed using the *vegan* package [48].

## 253 Data analysis

254 If not stated otherwise, all data processing, statistical analyses, and graphical representation were  
255 performed in R [49]. Data processing and visualisation were performed using the *tidyverse* package  
256 [50]. Graphical representations of matrices were constructed using the *ComplexHeatmap* package [51].  
257 Pearson's correlations ( $r$ ) were used to compare variables using the *cor()* function of the *stats* package.  
258 Linear or generalised linear regressions were constructed with the *lm()* or *glm()* function from the *stats*  
259 package, respectively, to evaluate the effect of the presence of an epiphyte, metabolic resource overlap  
260 (MRO), and/or time of sampling with the competitive ability of a strain against Pe299R in different  
261 environments (*in vitro* and in the phyllosphere). ANOVA were performed using the *aov()* function of the  
262 *stats* package. Eta squared ( $\eta^2$ ) was used to measure the effect size of the predictors in the regression  
263 models using the *lsr* package [52].

## 264 RESULTS

### 265 Differences in carbon utilisation are predicted by genome-scale 266 metabolic modelling

267 Differences in growth on different carbon sources and the metabolic resource overlap (MRO) between  
268 the focal species *Pantoea eucalypti* 299R (Pe299R) and members of actinobacteria, gamma-, and  
269 alphaproteobacteria (Fig. 1) were determined empirically and based on genome-scale metabolic  
270 models, respectively.

271 Individual strains were grown in MM supplemented with either 0.2% w/v glucose, fructose, malate,  
272 sorbitol, or 0.2% v/v methanol (Fig. S1a). Growth rate ( $\mu$ ) and carrying capacity (K) were retrieved for  
273 each growth curve and used to cluster the strains based on similarity (Fig. 2a, Table S2). Hierarchical  
274 clustering based on utilised resources placed Pe299R in a clade with the gammaproteobacterium  
275 *Pseudomonas koreensis* P19E3 (PkP19E3) and the actinobacterium *Arthrobacter* sp. Leaf145  
276 (ArthL145). These strains were able to grow on glucose, fructose, and malate, reaching high and similar  
277 K in liquid media. *Sphingomonas melonis* FR1 (SmFR1) and *Pseudomonas syringae* pv. *syringae*  
278 B728a (PssB728a) showed a similar utilisation pattern as the first clade. However, SmFR1 population  
279 did not reach a similar K, while PssB728a was also able to grow in sorbitol. The most dissimilar strains  
280 in relation to Pe299R were *Rhodococcus* sp. Leaf225 (RhodL225) and *Methylobacterium* sp. Leaf85  
281 (MethL85). The resulting carbon utilisation profile was used as an empirical distance matrix for resource  
282 use dissimilarity between Pe299R and a second strain.

283 The MRO is an estimation of the maximal overlap between the minimal growth requirements of two (or  
284 more) metabolic models [22]. Thus, MRO calculates the potential of species to compete for a list of  
285 compounds defined *a priori*. From a list that includes glucose, fructose, malate, sorbitol, and methanol  
286 as carbon sources (M5C),  $MRO_{M5C}$  was calculated for Pe299R and secondary strains (Fig. 2b, Table  
287 2). The strain pair Pe299R–ArthL145, as well as Pe299R–PkP19E3 showed the highest  $MRO_{M5C}$  values  
288 (0.77 and 0.74, respectively), which were part of the same cluster based on empirical growth profile,  
289 while the lowest  $MRO_{M5C}$  and highest profile dissimilarity were observed between the pairs Pe299R–

290 MethL85 and Pe299R–RhodL225 ( $MRO_{M5C}$  of 0.67 and 0.62, respectively). The carbon profile  
291 dissimilarity between Pe299R and a second strain was strongly correlated with  $MRO_{M5C}$  ( $r = -0.85$ ,  $p =$   
292  $0.032$ ) but not with phylogenetic distances ( $r = 0.27$ ,  $p = 0.60$ ). Additionally,  $MRO_{M5C}$  was a predictor of  
293 carbon profile dissimilarity between the focal and other strains (Fig. 2c). Linear regression analysis  
294 showed a negative relationship between MRO and carbon profile dissimilarity ( $R^2 = 0.65$ ,  $F_{1,4} = 10.41$ ,  
295  $p = 0.032$ ), suggesting that the use of genome-scale metabolic modelling can be used to explain strain  
296 differences in resource use in a defined environment.

## 297 Competition *in vitro* is driven by resource overlaps

298 To confirm the predictions of the genome-scale metabolic modelling, the ability of a competitor to affect  
299 the growth of a fluorescently red-labelled Pe299R strain (Pe299R::mSc) was evaluated *in vitro*. First,  
300 the optical density of every strain was measured in MM supplemented with multiple resources (MM<sub>5xC</sub>:  
301 0.025% w/v glucose, 0.025% w/v fructose, 0.025% w/v malate, 0.025% w/v sorbitol, and 0.025% v/v  
302 methanol) to confirm that each strain was able to growth under these conditions (Fig. S1b). To test the  
303 effect of a strain on the growth of Pe299R, Pe299R::mSc was mixed in a 1:1 ratio with a second strain  
304 and red fluorescence intensity was measured over time (Fig. 3a). If normalised by the fluorescence  
305 signal of a monoculture, constitutive fluorescence expression was shown to serve as a proxy for  
306 changes in bacterial biomass of individual strains in pairwise competitions [43].

307 Growth parameters from the fluorescence curves ( $\mu_{RFU}$ ,  $K_{RFU}$ ,  $AUC_{RFU}$ ) were retrieved and compared  
308 with a competitive ability score (Eq. 1, Table S3). This competition score includes both  $\mu_{RFU}$  and  $K_{RFU}$   
309 in interspecific competition (Pe299R::mSc vs.  $sp_2$ ) in comparison to intraspecific competition  
310 (Pe299R::mSc vs Pe299R) and the monoculture (Pe299R::mSc). The competition score showed a  
311 strong correlation with most metrics ( $|r| > 0.96$ ), except with growth rate alone (Fig. S2,  $r = 0.67$ ). Thus,  
312 changes in Pe299R growth in relation to the monoculture can be explained by the ability of a strain to  
313 compete with Pe299R (Fig. 3b,  $R^2 = 0.98$ ,  $F_{1,25} = 1272$ ,  $p < 0.05$ ). The highest competition scores were  
314 observed for PssB728a, PkP19E3, and ArthL145, while the lowest were RhodL225, MethL85, and  
315 SmFR1. Regression analysis was used to evaluate the effect of MRO and/or phylogenetic distances in  
316 the competition scores against Pe299R (Table S4). These competition outcomes were partially  
317 explained by  $MRO_{M5C}$  (Fig. 3c,  $R^2 = 0.46$ ,  $F_{1,22} = 20.67$ ,  $p < 0.05$ ). PssB728a showed the largest

318 deviation from the regression model, suggesting that mechanisms other than competition for carbon  
319 could explain the increased competitive ability of PssB728a *in vitro*. However, no interference  
320 competition was observed in double-layer assays on R2A (Fig. S3). By excluding PssB728a from this  
321 analysis, MRO<sub>M5C</sub> became a strong predictor of competitive ability ( $R^2 = 0.81$ ,  $F_{1,18} = 83.45$ ,  $p < 0.05$ ).  
322 Alternatively, a generalised linear model including MRO<sub>M5C</sub>, phylogenetic distance (PD), and the  
323 interaction between these terms explained the competitive ability of an epiphyte against Pe299R (Table  
324 S4, Gamma error distribution with a log link, pseudo- $R^2 = 0.89$ ,  $F_{1,20} = 9.61$ ,  $p = 0.0056$ ). In this model,  
325 the competitive score of an epiphyte depends on the interaction between MRO<sub>M5C</sub> and PD (MRO<sub>M5C</sub> ×  
326 PD:  $p = 0.0062$ ), in which the competitiveness of closely-related species to Pe299R are less dependent  
327 on MRO<sub>M5C</sub> than distantly-related species (Fig. S4a). These results indicate that the *in vitro*  
328 competitiveness of an epiphyte against Pe299R in a defined medium can be explained by the utilised  
329 resources that they have in common, as predicted by the MRO, and their phylogenetic distance.

## 330 Bacterial competition in the phyllosphere at different scales

### 331 reflect different competition outcomes

#### 332 Competition at the population scale

333 The effect of a competitor on the growth of Pe299R was evaluated in the arabidopsis phyllosphere by  
334 co-inoculating four-week-old arabidopsis plants with Pe299R<sub>CUSPER</sub> (Pe299R::mSc (pProbe\_CUSPER))  
335 and a second strain to estimate changes in population densities as well as single-cell reproductive  
336 success of Pe299R *in planta*.

337 In every case, total bacterial density was determined and increased over time to a similar maximal load  
338 (Fig. S5). Particularly, changes in CFU of Pe299R were dependent on both sampling time and presence  
339 of a competitor (Time × Competitor:  $F_{1,21} = 3.34$ ,  $p < 0.05$ ). Compared to monoculture, only the presence  
340 of SmFR1 and the near-isogenic Pe299R strain negatively impacted the Pe299R<sub>CUSPER</sub> population at  
341 24 and 48 hpi, respectively (Fig. 4a).

342 Although the presence of a competitor did not largely affect the Pe299R<sub>CUSPER</sub> population at the CFU-  
343 level, different MRO indexes were calculated based on carbon sources that have been detected on

344 arabidopsis leaves in an effort to explain differences in competitive abilities in this environment (Fig. S6,  
345 Table 2). The MRO with the most predictive power was the one calculated from a medium composition  
346 including ten carbon sources ( $MRO_{L10C}$ ): fumarate, sucrose, aspartate, malate, citrate, glutamate,  
347 alanine, fructose, threonine, and methanol (L10C, Table S1). These resources were the ten most  
348 abundant metabolites detected in arabidopsis leaves [39]. Particularly, compared to a similar  
349 composition including eight resources (L8C, Table S1), the presence of citrate, alanine, and threonine,  
350 as well as the absence of glucose, increased the predictability of competition outcomes, through an  
351 increase in the MRO between Pe299R and ArthL145 ( $MRO_{L8C} = 0.69$ ;  $MRO_{L10C} = 0.81$ ), and Pe299R  
352 and PssB728a ( $MRO_{L8C} = 0.59$ ;  $MRO_{L10C} = 0.67$ ). However, this effect was significant only when a linear  
353 regression model included  $MRO_{L10C}$  and the phylogenetic distance (PD) between an epiphyte and  
354 Pe299R (Fig. 4b,  $R^2 = 0.92$ ,  $F = 20.15$ ,  $p = 0.048$ ). The regression model suggests that the competitive  
355 ability of an epiphyte against Pe299R depends on both their resource overlap and phylogenetic  
356 relationships (Table S5,  $MRO_{L10C} \times PD$ :  $p = 0.029$ ). In the phyllosphere, high competition scores were  
357 observed among closely related species with high  $MRO_{L10C}$  (Fig. 4b, Fig. S4b). In summary, Pe299R  
358 population density in the phyllosphere was not largely affected by the presence of a competitor, and  
359 differences in the competitive ability of this second strain could be explained by both its resource overlap  
360 and phylogenetic relationship with Pe299R.

## 361 Competition at the single cell-resolution

362 An improved version of the CUSPER bioreporter plasmid was constructed and was used to develop  
363 Pe299R<sub>CUSPER</sub> (Fig. S7). In contrast to the initial CUSPER bioreporter, Pe299R<sub>CUSPER</sub> constitutively  
364 expresses a red fluorescent protein and carries the recently developed green fluorescent protein  
365 mClover3 in a multicopy plasmid, rather than a chromosomally inserted single copy of GFPmut3.  
366 Pe299R<sub>CUSPER</sub> is a bioreporter that estimates the reproductive success (RS) of immigrant cells in a new  
367 environment by back-calculating the number of divisions a cell underwent since its arrival [30–32].

368 The RS was determined by measuring the reduction in single cell green fluorescence compared to the  
369 mean green fluorescence of the population at time zero ( $t_0$ ), *ex situ*. Thereby, the reproductive success  
370 of a population and individual cells can be estimated. The limit of detection was determined based on  
371 the empirical cumulative distribution function from background fluorescence signals (Fig. S8a). A 5%  
372 probability represents RS values equal or greater than 4.58. Thus, a limit of detection of 4.5 cell divisions



373 was selected (Fig. S8b). Cells with RS values above 4.5 were grouped and considered to undergo more  
374 than four divisions ( $RS_{>4}$ ).

375 The relative increase in  $Pe299R_{CUSPER}$  population from the initial inoculum at a given time of sampling  
376 can be estimated based on the fraction of cells in a particular subpopulation and the number of divisions  
377 that a cell is expected to undergo upon arrival in the phyllosphere [31]. The increase in  $Pe299R_{CUSPER}$   
378 population from single-cell data was associated with the increase in population size at the CFU level  
379 ( $R^2 = 0.63$ ,  $F_{1,382} = 655.6$ ,  $p < 0.05$ ), suggesting that the single-cell measurements and the threshold  
380 used were adequate to assess changes in  $Pe299R_{CUSPER}$  populations. Similar to the results of the CFU-  
381 based population-level experiment above, the presence of competitors did not affect the average single-  
382 cell reproductive success of the  $Pe299R_{CUSPER}$  population compared to the monoculture (Fig. S9).

383 The distribution of immigrant cells that experienced different levels of reproductive success was  
384 analysed as relative fractions of the initial population. Cell groups were binned based on the number of  
385 divisions that the respective ancestral immigrant cell underwent after inoculation. The different bins for  
386 the number of divisions –the reproductive success– ranged from 0 to >4 generations after inoculation.  
387 Consequently, a population structure of  $Pe299R_{CUSPER}$  was defined based on the relative fraction of  
388 cells with different RS. The variation in the population structure of  $Pe299R_{CUSPER}$  could be explained by  
389 the time of sampling ( $R^2 = 0.10$ ,  $F_{1,55} = 8.69$ ,  $p = 0.001$ ) and the presence of competitors ( $R^2 = 0.27$ ,  
390  $F_{7,55} = 3.36$ ,  $p = 0.002$ ) using PERMANOVA (Table S6). The initial population was composed of cells  
391 with zero ( $RS_0$ ) or one division ( $RS_1$ ) across the different treatments, and were excluded from the  
392 multivariate analysis, as it only accounts for the initial population and not for underlying competitive  
393 interactions. At 24 and 36 hpi, cells that divided three and more times contributed most to the final  
394 populations (Fig. 5). For  $Pe299R_{CUSPER}$  in the presence of Pk19E3, PssB728a, ArthL145, RhodL225,  
395 and MethL85, a relatively high fraction of cells that divide between zero and three times was observed  
396 at 24 hpi, whose distribution became bimodal (Fig. S10). However, only the presence of PssB728a ( $R^2$   
397  $= 0.24$ ,  $F_{1,14} = 4.50$ ,  $p = 0.011$ ) and MethL85 ( $R^2 = 0.36$ ,  $F_{1,14} = 7.80$ ,  $p = 0.003$ ) led to a differentiation  
398 in the population structure of  $Pe299R_{CUSPER}$  compared to the monoculture (Fig. S11). Compared to  
399  $Pe299R_{CUSPER}$  as monoculture, the presence of PssB728a and MethL85 increased the relative fraction  
400 of  $Pe299R_{CUSPER}$  cells that divided more than four times. As PssB728a and MethL85 exhibited an  
401  $MRO_{L10C}$  with  $Pe299R$  of 0.67 and 0.69, respectively, which lie within one standard deviation from the

402 mean  $MRO_{L10C}$  of the tested strains ( $0.68 \pm 0.072$ ), the effect of epiphytes on the structure of the  
403 Pe299R population in the phyllosphere cannot be associated solely with their resource overlaps.

## 404 DISCUSSION

405 Understanding microbial community structure and dynamics in the phyllosphere requires a deeper  
406 investigation into the mechanisms that influence local microbe-microbe interactions. As resources are  
407 a limiting factor for bacterial colonisation [53], and negative interactions are common outcomes between  
408 microbes in the phyllosphere [14], we hypothesised that resource competition is the dominant type of  
409 interaction in this environment. A negative correlation between coexistence and similarity in resource  
410 utilisation has been shown for a number of pairs of epiphytic bacteria, including the focal species  
411 Pe299R [17]. On arabidopsis, plant-protective *Sphingomonas* spp. decrease the population of the  
412 phytopathogen *Pseudomonas syringae* pv. *tomato* DC3000. Although some sphingomonads suppress  
413 the proliferation of *P. syringae* pv. *tomato* DC3000 via priming of the plant immunity [54], the high  
414 resource overlaps between *P. syringae* pv. *tomato* DC3000 and the *Sphingomonas* spp. suggest that  
415 resource competition explains in parts the decrease in population size of the pathogen [55]. However,  
416 estimating bacterial resource preferences in complex and heterogeneous environments is challenging.  
417 In this work, genome-scale metabolic modelling was used to predict the outcome of species interactions  
418 under homogeneous *in vitro* conditions as well as in the heterogeneous phyllosphere.

419 Similarity in resource utilisation has been used to define a niche overlap index that includes a wide  
420 range of carbon sources, many of which are unlikely to be relevant on the leaf surface [17]. The  
421 availability of resources in a given environment and resource preference of competitors determine the  
422 effective resource overlap [56]. MRO is an index that incorporates the minimal growth requirements of  
423 a species' metabolic model under defined media composition *in silico* [22]. To our knowledge, MRO has  
424 not been used in combination or validated with empirical studies. Our results show that MRO reflects  
425 the dissimilarities in resource utilisation in bacterial batch cultures. To test whether MRO also predicts  
426 competition outcomes in heterogeneous environments, it was selected to link the similarity of resource  
427 preferences to competitive differences among epiphytes on leaves. Similar to other natural  
428 environments, the resource landscape on leaves is uneven and otherwise challenging to measure [1,  
429 2, 57, 58]. The MRO calculated from the ten most abundant resources in the arabidopsis leaf  
430 metabolome [39] were predictive for the competition outcomes of the here-studied strains. It is worth  
431 noting that the selected resources cannot be generalised for competitions on leaves, as other strains  
432 could compete for resources that were not included in the MRO calculation, such as low abundant or

433 rare resources [59], vitamins [60], or iron [57, 61]. However, MRO calculated using additional resources  
434 did not increase the explanatory power of resource overlap in this study, suggesting that major  
435 competition in the phyllosphere is restricted to a limited set of most abundant resources.

436 Generally, predictability of the competition ability *in vitro* and, especially in the phyllosphere improved  
437 when phylogenetic distances were accounted for as a factor in the analysis. Phylogenetic distance was  
438 included in the model, as taxon-dependent characteristics may favour either high or low phylogenetic  
439 diversity [62]. For example, competition between *Pseudomonas fluorescens* SBW25 and other species  
440 decreased at increasing phylogenetic distances, which correlated with increased niche differences [63].  
441 However, MRO does not exclusively correlate with phylogenetic distances, which is congruent with  
442 previous findings showing that genes associated with carbon source utilisation are not phylogenetically  
443 conserved [64]. The lack of phylogenetic conservation also holds true for plant-associated bacteria, as  
444 comparative genomic analysis of the arabidopsis microbiota showed a high overlap of genes linked to  
445 carbon and amino acid metabolism, independent of their phylogeny [65]. The results presented in this  
446 work suggest that evolutionary-conserved traits contribute to competition outcomes in the phyllosphere.  
447 Traits such as aggregation, motility, communication, production of biosurfactants and/or siderophores  
448 could influence the fitness of leaf colonisers. Our results are therefore congruent with modern  
449 coexistence theory, where competitive exclusion depends on niche differences (e.g., high resource  
450 overlap) and fitness differences between competing species [12, 66].

451 Pe299R<sub>CUSPER</sub> was used to measure the single-cell reproductive success of Pe299R and to estimate  
452 bacterial fitness in competition *in planta*. This bioreporter relies on the fluorescence intensity of  
453 individual cells, which can be traced back to the dilution of a fluorescent protein after cell division [30].  
454 The number of divisions that can be determined is however limited to the initial four cell divisions. This  
455 bioreporter was instrumental in understanding that bacterial populations in the phyllosphere separate  
456 into subpopulations over time [30].

457 The observed RS heterogeneity within arabidopsis-colonising Pe299R<sub>CUSPER</sub> is congruent with findings  
458 in the phyllosphere of bush bean leaves (*Phaseolus vulgaris*) [30]. This supports the notion that variable  
459 habitability is a common feature of the phyllosphere of different species. The plant host impacts on  
460 bacterial colonisation, suggesting that the host could influence bacteria-bacteria interactions by  
461 environment modifications through variations of metabolite availability during the circadian cycle [38],

462 leaf side [67], leaf development [68, 69], ageing [70], and cuticle composition [71]. Differences in  
463 reproductive success within the Pe299R population correlate with, but are not limited to, spatially distinct  
464 resource pools, such as carbohydrates and water, on leaves [1, 2, 72]. Considering the variable fate of  
465 bacterial cells during leaf colonisation, the effect of resource overlap in bacterial interactions was  
466 expected to be evaluated at the single-cell level. While we showed that the presence of other strains  
467 did not lead to differences compared to the Pe299R<sub>CUSPER</sub> monoculture, PssB728a and MethL85  
468 positively affected RS at the single cell level.

469 Despite showing the highest population-level competitive scores while not featuring a notably low MRO,  
470 the fraction of successful Pe299R cells (>4 divisions) were higher in the presence of PssB728a  
471 compared to the monoculture. This suggests that mechanisms other than resource competition were  
472 influencing the interactions between Pe299R and PssB728a. The pseudomonad PKP19E shows a  
473 similar, albeit not statistically significant, effect by increasing the fraction of cells in the Pe299R  
474 population that has a RS >4. *Pseudomonas* spp. produce biosurfactants, i.e. amphiphilic molecules that  
475 decrease water surface tension and thereby increase resource permeability onto the leaf surface, and  
476 increase bacterial survival due to their water retaining hygroscopic nature [73–76]. By producing  
477 biosurfactants, *Pseudomonas* spp. could thereby benefit Pe299R. Alternatively, these strains could  
478 engage in cooperative interactions such as cross-feeding, as observed between *Pantoea* spp. and  
479 *Pseudomonas koreensis* in the *Flaveria robusta* leaf apoplast [77]. However, further investigations are  
480 required to understand the mechanisms that result in beneficial interactions in the phyllosphere.

481 MethL85 belongs to a group of resource specialists and facultative methylotrophs from the genus  
482 *Methylobacterium*. Methanol utilisation is a fitness advantage in the phyllosphere, as methylotrophs can  
483 utilise the released methanol from the plant cell wall metabolism [40]. As one carbon metabolism is  
484 highly overrepresented in proteomes of methyllobacteria on leaves [78, 79], it is expected that MethL85  
485 utilises methanol as a main carbon source and does not compete with Pe299R for their preferred carbon  
486 sources. Possibly, additional biomass and the biosurfactant production of the strain may act as a water  
487 retaining factor which increases survival and spread of bacteria [73, 74, 80]. Hence, additional growth  
488 of Pe299R in presence of MethL85 compared to a near isogenic co-inoculant is not unexpected.

489 Our results suggest that there is little impact of resource overlap on the competition between bacteria  
490 that co-colonise the leaf surface. This could be a result of the strong segregation of habitable sites on

491 leaves and low initial bacterial densities at the time of inoculation. Thus, resource competition in  
492 combination with historical contingency caused by priority effects could have a larger impact on  
493 competition outcomes. Although co-colonisation had little effect on Pe299R, this could change after pre-  
494-emptive colonisation by a competitor [32, 61].

495 Overall, we observed a relationship between the resource overlap and the competition of pairs of  
496 species in both homogeneous and heterogeneous environments. This relationship was stronger and  
497 more predictive *in vitro* compared to the phyllosphere. However, single-cell measurements did not  
498 correlate with population-level measurements, indicating that competition is operating at the  
499 micrometre, or single-cell resolution and thus, local competition cannot be investigated by measuring  
500 interactions and changes in population densities at the whole-leaf scale. Regardless, our findings  
501 support an important role of resource overlap in community assembly processes of bacteria in the  
502 phyllosphere. This is in line with previous findings that related resource overlap of competitors with  
503 disease severity on tomato plants [81] and co-existence of near-isogenic strains that differed only in the  
504 ability to metabolise an additional resource [17].

505 Understanding the impact of resource competition during bacterial community assemblage in the  
506 phyllosphere has major implications in developing effective biocontrol strategies against  
507 phytopathogens [82, 83]. Many bacterial foliar pathogens undergo an epiphytic phase during the initial  
508 colonisation of leaves [84]. This phase is characterised by population growth before invading the  
509 endophytic compartments. The rational design of biocontrol agents or communities to reduce pathogen  
510 populations in the phyllosphere through competitive interactions could prevent crop losses caused by  
511 microbial diseases. However, our findings showed that colonisation prevention of leaves by bacteria  
512 that feature different degrees of resource overlap in the phyllosphere is challenging. Previous metrics  
513 of resource overlap that considered many different resources are not the best strategy to select for  
514 strong competitors against a focal species [17]. Instead, resource overlap metrics should consider  
515 resources that are most relevant in the system and for the phytopathogen to be controlled, and traits  
516 that are phylogenetically conserved. In this study, ten resources detected in arabidopsis leaves had the  
517 most predictive power. Additional resources did not increase the predictive outcome of the metric (Table  
518 S5). Thus, we consider MRO in conjunction with information of resource abundances in the  
519 phyllosphere of arabidopsis more suitable than previous metrics.

## 520 ACKNOWLEDGEMENTS

521 We would like to thank Paula Jameson and Matthew Stott for insightful discussions. This work was  
522 supported by Marsden Fast Start grant number 17-UOC-057 (M.N.P.R.-E.). R.O.S. was supported by  
523 a New Zealand International Doctoral Research Scholarship (NZIDRS) and a University of Canterbury  
524 College of Science Ph.D. scholarship. M.B. was supported by a University of Canterbury Ph.D.  
525 scholarship. We would also like to thank the HPC Service of ZEDAT, Freie Universität Berlin, for  
526 computing time.

## 527 REFERENCES

- 528 1. Doan HK, Ngassam VN, Gilmore SF, Tecon R, Parikh AN, Leveau JHJ. Topography-driven  
529 shape, spread, and retention of leaf surface water impacts microbial dispersion and activity in the  
530 phyllosphere. *Phytobiomes J.* 2020; 4: 268–280.
- 531 2. Leveau JH, Lindow SE. Appetite of an epiphyte: quantitative monitoring of bacterial sugar  
532 consumption in the phyllosphere. *Proc. Natl. Acad. Sci. U. S. A.* 2001; 98: 3446–3453.
- 533 3. Remus-Emsermann MNP, Schlechter RO. Phyllosphere microbiology: at the interface  
534 between microbial individuals and the plant host. *New Phytol.* 2018; 218: 1327–1333.
- 535 4. Remus-Emsermann MNP, Lückner S, Müller DB, Potthoff E, Daims H, Vorholt JA. Spatial  
536 distribution analyses of natural phyllosphere-colonizing bacteria on *Arabidopsis thaliana* revealed by  
537 fluorescence in situ hybridization. *Environ. Microbiol.* 2014; 16: 2329–2340.
- 538 5. Esser DS, Leveau JHJ, Meyer KM, Wiegand K. Spatial scales of interactions among bacteria  
539 and between bacteria and the leaf surface. *FEMS Microbiol. Ecol.* 2015; 91.
- 540 6. Steinberg S, Grinberg M, Beitelman M, Peixoto J, Orevi T, Kashtan N. Two-way microscale  
541 interactions between immigrant bacteria and plant leaf microbiota as revealed by live imaging. *ISME*  
542 *J.* 2021; 15: 409–420.
- 543 7. Schlechter RO, Miebach M, Remus-Emsermann MNP. Driving factors of epiphytic bacterial  
544 communities: A review. *J. Adv. Res.* 2019, 19: 57–65.
- 545 8. Agler MT, Ruhe J, Kroll S, Morhenn C, Kim S-T, Weigel D, Kemen EM. Microbial Hub Taxa  
546 Link Host and Abiotic Factors to Plant Microbiome Variation. *PLoS Biol.* 2016; 14: e1002352.
- 547 9. Carlström CI, Field CM, Bortfeld-Miller M, Müller B, Sunagawa S, Vorholt JA. Synthetic  
548 microbiota reveal priority effects and keystone strains in the *Arabidopsis phyllosphere*. *Nat. Ecol. Evol.*  
549 2019; 3: 1445–1454.
- 550 10. Lidicker WZ Jr. A clarification of interactions in ecological systems. *Bioscience.* 1979; 29:  
551 475–477.



- 552 11. Hassani MA, Durán P, Hacquard S. Microbial interactions within the plant holobiont.  
553 Microbiome. 2018; 6: 58.
- 554 12. Chesson P. Mechanisms of maintenance of species diversity. Annu. Rev. Ecol. Syst. 2000;  
555 31: 343–366.
- 556 13. Letten AD, Ke P-J, Fukami T. Linking modern coexistence theory and contemporary niche  
557 theory. Ecol. Monogr. 2017; 87: 161–177.
- 558 14. Schäfer M, Vogel CM, Bortfeld-Miller M, Mittelviehhaus M, Vorholt JA. Mapping phyllosphere  
559 microbiota interactions in planta to establish genotype-phenotype relationships. Nat. Microbiol. 2022;  
560 7: 856–867.
- 561 15. Helfrich EJN, Vogel CM, Ueoka R, Schäfer M, Ryffel F, Müller DB, Probst S, Kreuzer M, Piel  
562 J, Vorholt JA. Bipartite interactions, antibiotic production and biosynthetic potential of the Arabidopsis  
563 leaf microbiome. Nat. Microbiol. 2018; 3: 909–919.
- 564 16. Wilson M, Lindow SE. Ecological Similarity and Coexistence of Epiphytic Ice-Nucleating (Ice)  
565 *Pseudomonas syringae* Strains and a Non-Ice-Nucleating (Ice) Biological Control Agent. Appl.  
566 Environ. Microbiol. 1994; 60: 3128–3137.
- 567 17. Wilson M, Lindow SE. Coexistence among Epiphytic Bacterial Populations Mediated through  
568 Nutritional Resource Partitioning. Appl. Environ. Microbiol. 1994; 60: 4468–4477.
- 569 18. Dianese AC, Ji P, Wilson M. Nutritional similarity between leaf-associated nonpathogenic  
570 bacteria and the pathogen is not predictive of efficacy in biological control of bacterial spot of tomato.  
571 Appl. Environ. Microbiol. 2003; 69: 3484–3491.
- 572 19. Diener C, Gibbons SM, Resendis-Antonio O. MICOM: Metagenome-Scale Modeling To Infer  
573 Metabolic Interactions in the Gut Microbiota. mSystems. 2020; 5.
- 574 20. Muller EEL, Faust K, Widder S, Herold M, Arbas SM, Wilmes P. Using metabolic networks to  
575 resolve ecological properties of microbiomes. Curr. Opin. Syst. Biol. 2018, 8: 73–80.

- 576 21. Freilich S, Zarecki R, Eilam O, Segal ES, Henry CS, Kupiec M, Gophna U, Sharan R, Ruppin  
577 E. Competitive and cooperative metabolic interactions in bacterial communities. *Nat. Commun.* 2011;  
578 2: 589.
- 579 22. Zelezniak A, Andrejev S, Ponomarova O, Mende DR, Bork P, Patil KR. Metabolic  
580 dependencies drive species co-occurrence in diverse microbial communities. *Proc. Natl. Acad. Sci. U.*  
581 *S. A.* 2015; 112: 6449–6454.
- 582 23. Hester ER, Jetten MSM, Welte CU, Lucker S. Metabolic Overlap in Environmentally Diverse  
583 Microbial Communities. *Front. Genet.* 2019; 10: 989.
- 584 24. Dal Co A, van Vliet S, Kiviet DJ, Schlegel S, Ackermann M. Short-range interactions govern  
585 the dynamics and functions of microbial communities. *Nat. Ecol. Evol.* 2020; 4: 366–375.
- 586 25. Tecon R, Ebrahimi A, Kleyer H, Levi SE, Or D. Cell-to-cell bacterial interactions promoted by  
587 drier conditions on soil surfaces. *Proc. Natl. Acad. Sci. U. S. A.* 2018, 115: 9791–9796
- 588 26. Monier J-M, Lindow SE. Aggregates of resident bacteria facilitate survival of immigrant  
589 bacteria on leaf surfaces. *Microb. Ecol.* 2005; 49: 343–352.
- 590 27. Wilson M, Hirano SS, Lindow SE. Location and survival of leaf-associated bacteria in relation  
591 to pathogenicity and potential for growth within the leaf. *Appl. Environ. Microbiol.* 1999; 65: 1435–  
592 1443.
- 593 28. Tecon R, Leveau JHJ. The mechanics of bacterial cluster formation on plant leaf surfaces as  
594 revealed by bioreporter technology. *Environ. Microbiol.* 2012; 14: 1325–1332.
- 595 29. Remus-Emsermann MNP, Kim EB, Marco ML, Tecon R, Leveau JHJ. Draft Genome  
596 Sequence of the Phyllosphere Model Bacterium *Pantoea agglomerans* 299R. *Genome Announc.*  
597 2013; 1.
- 598 30. Remus-Emsermann MNP, Leveau JHJ. Linking environmental heterogeneity and  
599 reproductive success at single-cell resolution. *ISME J.* 2010; 4: 215–222.
- 600 31. Remus-Emsermann MNP, Tecon R, Kowalchuk GA, Leveau JHJ. Variation in local carrying  
601 capacity and the individual fate of bacterial colonizers in the phyllosphere. *ISME J.* 2012; 6: 756–765.

- 602 32. Remus-Emsermann MNP, Kowalchuk GA, Leveau JHJ. Single-cell versus population-level  
603 reproductive success of bacterial immigrants to pre-colonized leaf surfaces. *Environ. Microbiol. Rep.*  
604 2013; 5: 387–392.
- 605 33. Peyraud R, Kiefer P, Christen P, Massou S, Portais J-C, Vorholt JA. Demonstration of the  
606 ethylmalonyl-CoA pathway by using <sup>13</sup>C metabolomics. *Proc. Natl. Acad. Sci. U. S. A.* 2009; 106:  
607 4846–4851.
- 608 34. Wu M, Eisen JA. A simple, fast, and accurate method of phylogenomic inference. *Genome*  
609 *Biol.* 2008; 9: R151.
- 610 35. Paradis E, Schliep K. ape 5.0: an environment for modern phylogenetics and evolutionary  
611 analyses in R. *Bioinformatics* 2019; 35: 526–528.
- 612 36. Sprouffske K, Wagner A. Growthcurver: an R package for obtaining interpretable metrics from  
613 microbial growth curves. *BMC Bioinformatics.* 2016; 17: 172.
- 614 37. Machado D, Andrejev S, Tramontano M, Patil KR. Fast automated reconstruction of genome-  
615 scale metabolic models for microbial species and communities. *Nucleic Acids Res.* 2018; 46: 7542–  
616 7553.
- 617 38. Augustijn D, Roy U, van Schadewijk R, de Groot HJM, Alia A. Metabolic Profiling of Intact  
618 *Arabidopsis thaliana* Leaves during Circadian Cycle Using <sup>1</sup>H High Resolution Magic Angle Spinning  
619 NMR. *PLoS One.* 2016; 11: e0163258.
- 620 39. Badri DV, Zolla G, Bakker MG, Manter DK, Vivanco JM. Potential impact of soil microbiomes  
621 on the leaf metabolome and on herbivore feeding behavior. *New Phytol.* 2013; 198: 264–273.
- 622 40. Corpe WA, Rheem S. Ecology of the methylotrophic bacteria on living leaf surfaces. *FEMS*  
623 *Microbiol. Lett.* 1989; 62: 243–249.
- 624 41. Dorokhov YL, Sheshukova EV, Komarova TV. Methanol in Plant Life. *Front. Plant Sci.* 2018;  
625 9: 1623.
- 626 42. Bennett L, Melchers B, Proppe B. Curta: A General-purpose High-Performance Computer at  
627 ZEDAT, Freie Universität Berlin. 2020. Freie Universität Berlin.

- 628 43. Schlechter RO, Kear EJ, Remus DM, Remus-Emsermann MNP. Fluorescent Protein  
629 Expression as a Proxy for Bacterial Fitness in a High-Throughput Assay. *Appl. Environ. Microbiol.*  
630 2021; 87: e0098221.
- 631 44. Hart SP, Freckleton RP, Levine JM. How to quantify competitive ability. *J. Ecol.* 2018; 106:  
632 1902–1909.
- 633 45. Godwin CM, Chang F-H, Cardinale BJ. An empiricist's guide to modern coexistence theory for  
634 competitive communities. *Oikos.* 2020; 129: 1109–1127.
- 635 46. Miebach M, Schlechter RO, Clemens J, Jameson PE, Remus-Emsermann MNP. Litterbox-A  
636 gnotobiotic Zeolite-Clay System to Investigate Arabidopsis-Microbe Interactions. *Microorganisms.*  
637 2020; 8.
- 638 47. Schindelin J, Arganda-Carreras I, Frise E, Kaynig V, Longair M, Pietzsch T, Preibisch S,  
639 Rueden C, Saalfeld S, Schmid B, Tinevez J-Y, White DJ, Hartenstein V, Eliceiri K, Tomancak P,  
640 Cardona A. Fiji: an open-source platform for biological-image analysis. *Nat. Methods.* 2012; 9: 676–  
641 682.
- 642 48. Dixon P. VEGAN, a package of R functions for community ecology. *J. Veg. Sci.* 2003; 14:  
643 927–930.
- 644 49. R Core Team. R: A language and environment for statistical computing. R Foundation for  
645 Statistical Computing, Vienna, Austria. <https://www.R-project.org/>.
- 646 50. Wickham H, Averick M, Bryan J, Chang W, McGowan LD, François R, Grolemund G, Hayes  
647 A, Henry L, Hester J, Kuhn M, LPedersen TL, Miller E, Bache SM, Müller K, Ooms J, Robinson D,  
648 Seidel DP, Spinu V, Takahashi K, Vaughan D, Wilke C, Woo K, Yutani H. Welcome to the Tidyverse.  
649 *J. Open Source Softw.* 2019; 4: 1686.
- 650 51. Gu Z, Eils R, Schlesner M. Complex heatmaps reveal patterns and correlations in  
651 multidimensional genomic data. *Bioinformatics.* 2016; 32: 2847–2849.
- 652 52. Navarro D. Learning statistics with R: A tutorial for psychology students and other beginners  
653 (Version 0.5). University of Adelaide. 2015.

- 654 53. Mercier J, Lindow SE. Role of leaf surface sugars in colonization of plants by bacterial  
655 epiphytes. *Appl. Environ. Microbiol.* 2000; 66: 369–374.
- 656 54. Vogel CM, Potthoff DB, Schäfer M, Barandun N, Vorholt JA. Protective role of the *Arabidopsis*  
657 leaf microbiota against a bacterial pathogen. *Nat. Microbiol.* 2021; 6: 1537–1548.
- 658 55. Innerebner G, Knief C, Vorholt JA. Protection of *Arabidopsis thaliana* against leaf-pathogenic  
659 *Pseudomonas syringae* by *Sphingomonas* strains in a controlled model system. *Appl. Environ.*  
660 *Microbiol.* 2011; 77: 3202–3210.
- 661 56. May RM, MacArthur RH. Niche overlap as a function of environmental variability. *Proc. Natl.*  
662 *Acad. Sci. U. S. A.* 1972; 69: 1109–1113.
- 663 57. Loper JE, Lindow SE. A biological sensor for iron available to bacteria in their habitats on  
664 plant surfaces. *Appl. Environ. Microbiol.* 1994; 60: 1934–1941.
- 665 58. Hernandez MN, Lindow SE. *Pseudomonas syringae* Increases Water Availability in Leaf  
666 Microenvironments via Production of Hygroscopic Syringafactin. *Appl. Environ. Microbiol.* 2019; 85.
- 667 59. Hemmerle L, Ochsner AM, Vonderach T, Hattendorf B, Vorholt JA. Mass spectrometry-based  
668 approaches to study lanthanides and lanthanide-dependent proteins in the phyllosphere. *Methods*  
669 *Enzymol.* 2021; 650: 215–236.
- 670 60. Ryback B, Bortfeld-Miller M, Vorholt JA. Metabolic adaptation to vitamin auxotrophy by leaf-  
671 associated bacteria. *ISME J.* 2022; 16: 2712–2724.
- 672 61. Müller L, Müller DC, Kammerecker S, Fluri M, Neutsch L, Remus Emsermann M, Pelludat C.  
673 Priority Effects in the Apple Flower Determine If the Siderophore Desferrioxamine Is a Virulence  
674 Factor for *Erwinia amylovora* CFBP1430. *Appl. Environ. Microbiol.* 2022; e0243321.
- 675 62. Mayfield MM, Levine JM. Opposing effects of competitive exclusion on the phylogenetic  
676 structure of communities. *Ecol. Lett.* 2010; 13: 1085–1093.
- 677 63. Tan J, Slattery MR, Yang X, Jiang L. Phylogenetic context determines the role of competition  
678 in adaptive radiation. *Proc. Biol. Sci.* 2016; 283.

- 679 64. Martiny AC, Treseder K, Pusch G. Phylogenetic conservatism of functional traits in  
680 microorganisms. *ISME J.* 2013; 7: 830–838.
- 681 65. Bai Y, Müller DB, Srinivas G, Garrido-Oter R, Potthoff E, Rott M, Dombrowski N, Münch PC,  
682 Spaepen S, Remus-Emsermann M, Hüttel B, McHardy AC, Vorholt JA, Schulze-Lefert P. Functional  
683 overlap of the *Arabidopsis* leaf and root microbiota. *Nature.* 2015; 528: 364–369.
- 684 66. HilleRisLambers J, Adler PB, Harpole WS, Levine JM, Mayfield MM. Rethinking community  
685 assembly through the lens of coexistence theory. *Annu. Rev. Ecol. Evol. Syst.* 2012; 43: 227–248.
- 686 67. Smets W, Chock MK, Walsh CM, Vanderburgh CQ, Kau E, Lindow SE, Fierer N, Koskella B.  
687 Leaf side determines the relative importance of dispersal versus host filtering in the phyllosphere  
688 microbiome. *bioRxiv.* 2022, 2022.08.16.504148; doi: <https://doi.org/10.1101/2022.08.16.504148>.
- 689 68. Copeland JK, Yuan L, Layeghifard M, Wang PW, Guttman DS. Seasonal community  
690 succession of the phyllosphere microbiome. *Mol. Plant Microbe Interact.* 2015; 28: 274–285.
- 691 69. Beilsmith K, Perisin M, Bergelson J. Natural Bacterial Assemblages in *Arabidopsis thaliana*  
692 Tissues Become More Distinguishable and Diverse during Host Development. *mBio.* 2021, 12; 1:  
693 e02723-20.
- 694 70. Wagner MR, Lundberg DS, Del Rio TG, Tringe SG, Dangl JL, Mitchell-Olds T. Host genotype  
695 and age shape the leaf and root microbiomes of a wild perennial plant. *Nat. Commun.* 2016; 7: 12151.
- 696 71. Bodenhausen N, Bortfeld-Miller M, Ackermann M, Vorholt JA. A synthetic community  
697 approach reveals plant genotypes affecting the phyllosphere microbiota. *PLoS Genet.* 2014; 10:  
698 e1004283.
- 699 72. Remus-Emsermann MNP, de Oliveira S, Schreiber L, Leveau JHJ. Quantification of lateral  
700 heterogeneity in carbohydrate permeability of isolated plant leaf cuticles. *Front. Microbiol.* 2011; 2:  
701 197.
- 702 73. Burch AY, Zeisler V, Yokota K, Schreiber L, Lindow SE. The hygroscopic biosurfactant  
703 syringafactin produced by *Pseudomonas syringae* enhances fitness on leaf surfaces during fluctuating  
704 humidity. *Environ. Microbiol.* 2014; 16: 2086–2098.

- 705 74. Oso S, Walters M, Schlechter RO, Remus-Emsermann MNP. Utilisation of hydrocarbons and  
706 production of surfactants by bacteria isolated from plant leaf surfaces. *FEMS Microbiol. Lett.* 2019;  
707 366: fnz061.
- 708 75. Schreiber L, Krimm U, Knoll D, Sayed M, Auling G, Kroppenstedt RM. Plant-microbe  
709 interactions: identification of epiphytic bacteria and their ability to alter leaf surface permeability. *New*  
710 *Phytol.* 2005; 166: 589–594.
- 711 76. Oso S, Fuchs F, Übermuth C, Zander L, Daunaraviciute S, Remus DM, Stötzel I, Wüst M,  
712 Schreiber L, Remus-Emsermann MNP. Biosurfactants Produced by Phyllosphere-Colonizing  
713 Pseudomonads Impact Diesel Degradation but Not Colonization of Leaves of Gnotobiotic *Arabidopsis*  
714 *thaliana*. *Appl. Environ. Microbiol* 2021; 87.
- 715 77. Murillo-Roos M, Abdullah HSM, Debbar M, Ueberschaar N, Agler MT. Cross-feeding niches  
716 among commensal leaf bacteria are shaped by the interaction of strain-level diversity and resource  
717 availability. *ISME J.* 2022; 16: 2280-2289.
- 718 78. Delmotte N, Knief C, Chaffron S, Innerebner G, Roschitzki B, Schlapbach R, von Mering C,  
719 Vorholt JA. Community proteogenomics reveals insights into the physiology of phyllosphere bacteria.  
720 *Proc. Natl. Acad. Sci. U. S. A.* 2009; 106: 16428–16433.
- 721 79. Müller DB, Schubert OT, Röst H, Aebersold R, Vorholt JA. Systems-level Proteomics of Two  
722 Ubiquitous Leaf Commensals Reveals Complementary Adaptive Traits for Phyllosphere Colonization.  
723 *Mol. Cell Proteomics.* 2016; 15: 3256–3269.
- 724 80. Wilson M, Lindow SE. Inoculum Density-Dependent Mortality and Colonization of the  
725 Phyllosphere by *Pseudomonas syringae*. *Appl. Environ. Microbiol.* 1994; 60: 2232–2237.
- 726 81. Ji P, Wilson M. Assessment of the importance of similarity in carbon source utilization profiles  
727 between the biological control agent and the pathogen in biological control of bacterial speck of  
728 tomato. *Appl. Environ. Microbiol.* 2002; 68: 4383–4389.
- 729 82. Wei Z, Yang T, Friman V-P, Xu Y, Shen Q, Jousset A. Trophic network architecture of root-  
730 associated bacterial communities determines pathogen invasion and plant health. *Nat. Commun.*  
731 2015; 6: 8413.

- 732 83. Vorholt JA, Vogel C, Carlström CI, Müller DB. Establishing Causality: Opportunities of  
733 Synthetic Communities for Plant Microbiome Research. *Cell Host Microbe*. 2017; 22: 142–155.
- 734 84. Hirano SS, Upper CD. Bacteria in the leaf ecosystem with emphasis on *Pseudomonas*  
735 *syringae*-a pathogen, ice nucleus, and epiphyte. *Microbiol. Mol. Biol. Rev.* 2000; 64: 624–653.



736 **FIGURES**

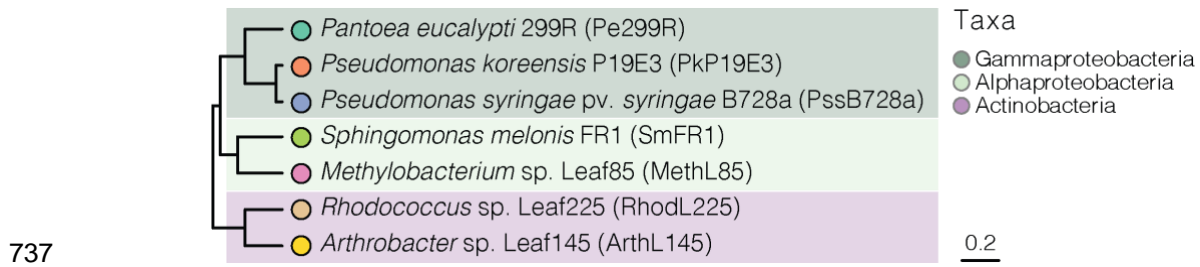

738 **Figure 1. Phylogenetic tree of phyllosphere-associated bacterial strains.** An UPGMA tree was  
739 created for the strains used in this study using a set of 31 single-copy marker genes [34]. Scale bar  
740 represents the number of substitutions per site.

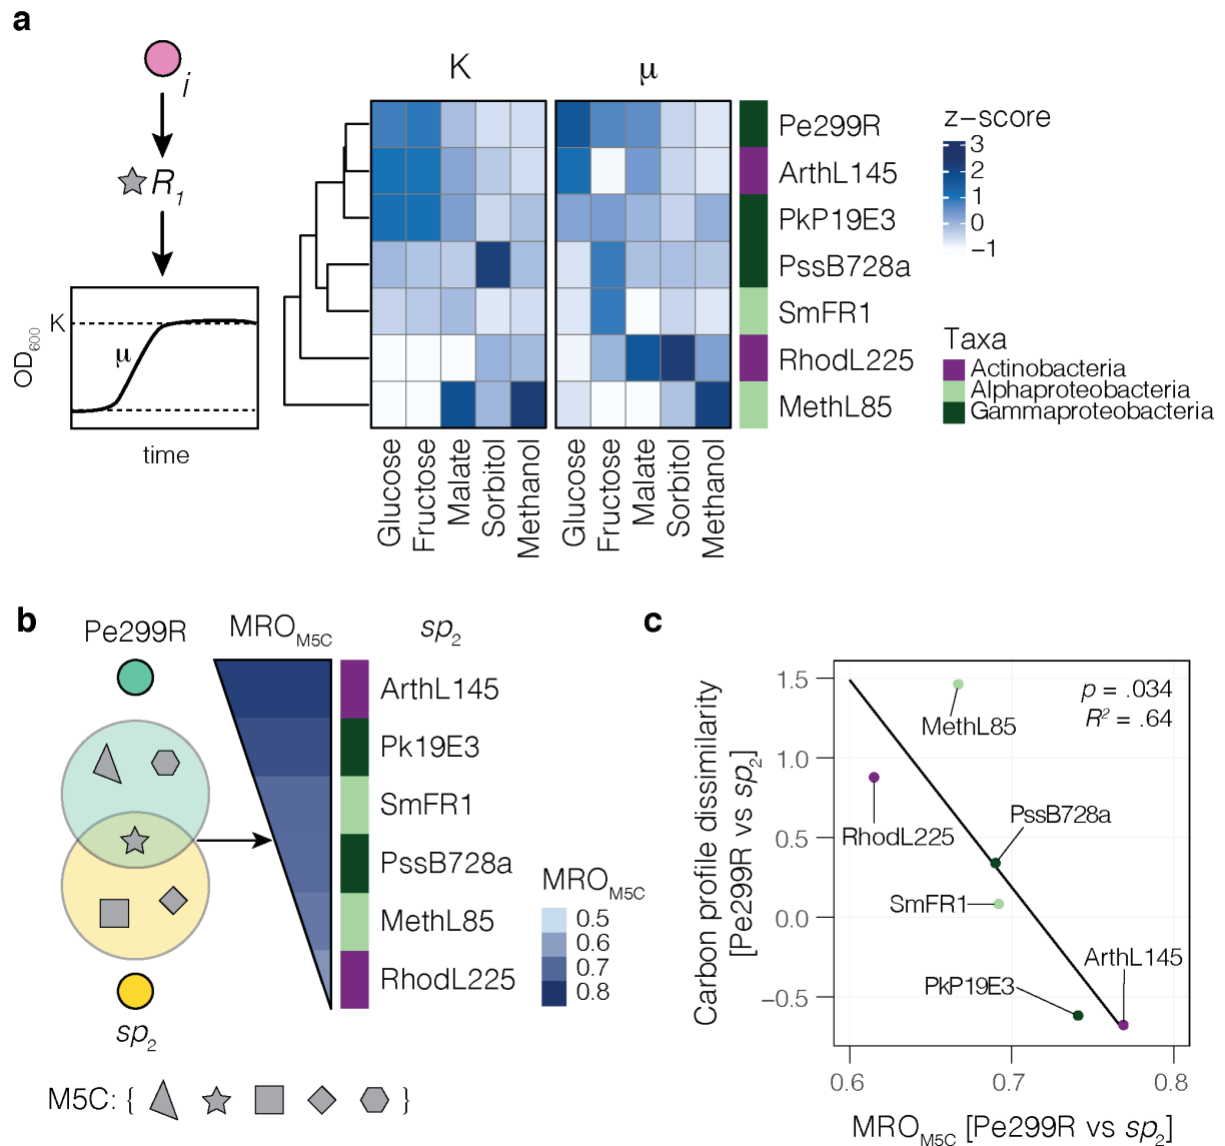

741

742 **Figure 2. Metabolic resource overlap portrays differences in empirical carbon utilisation profiles**

743 **between Pe299R and a second strain. (a)** Carbon utilisation matrix. Bacterial strains were clustered

744 based on carrying capacity (K) and growth rates ( $\mu$ ) from growth in minimal medium supplemented with

745 individual carbon sources. Values were rescaled into z-scores for hierarchical clustering. **(b)** Metabolic

746 resource overlap (MRO) is an index of resource similarity modelled, based on genomic information,

747 under *in silico* media composition including glucose, fructose, malate, sorbitol, and methanol (M5C).

748 Strains were ranked based on descending  $MRO_{M5C}$  with Pe299R. **(c)** Linear relationship of  $MRO_{M5C}$

749 and carbon profile dissimilarity between Pe299R and a second strain ( $sp_2$ ).

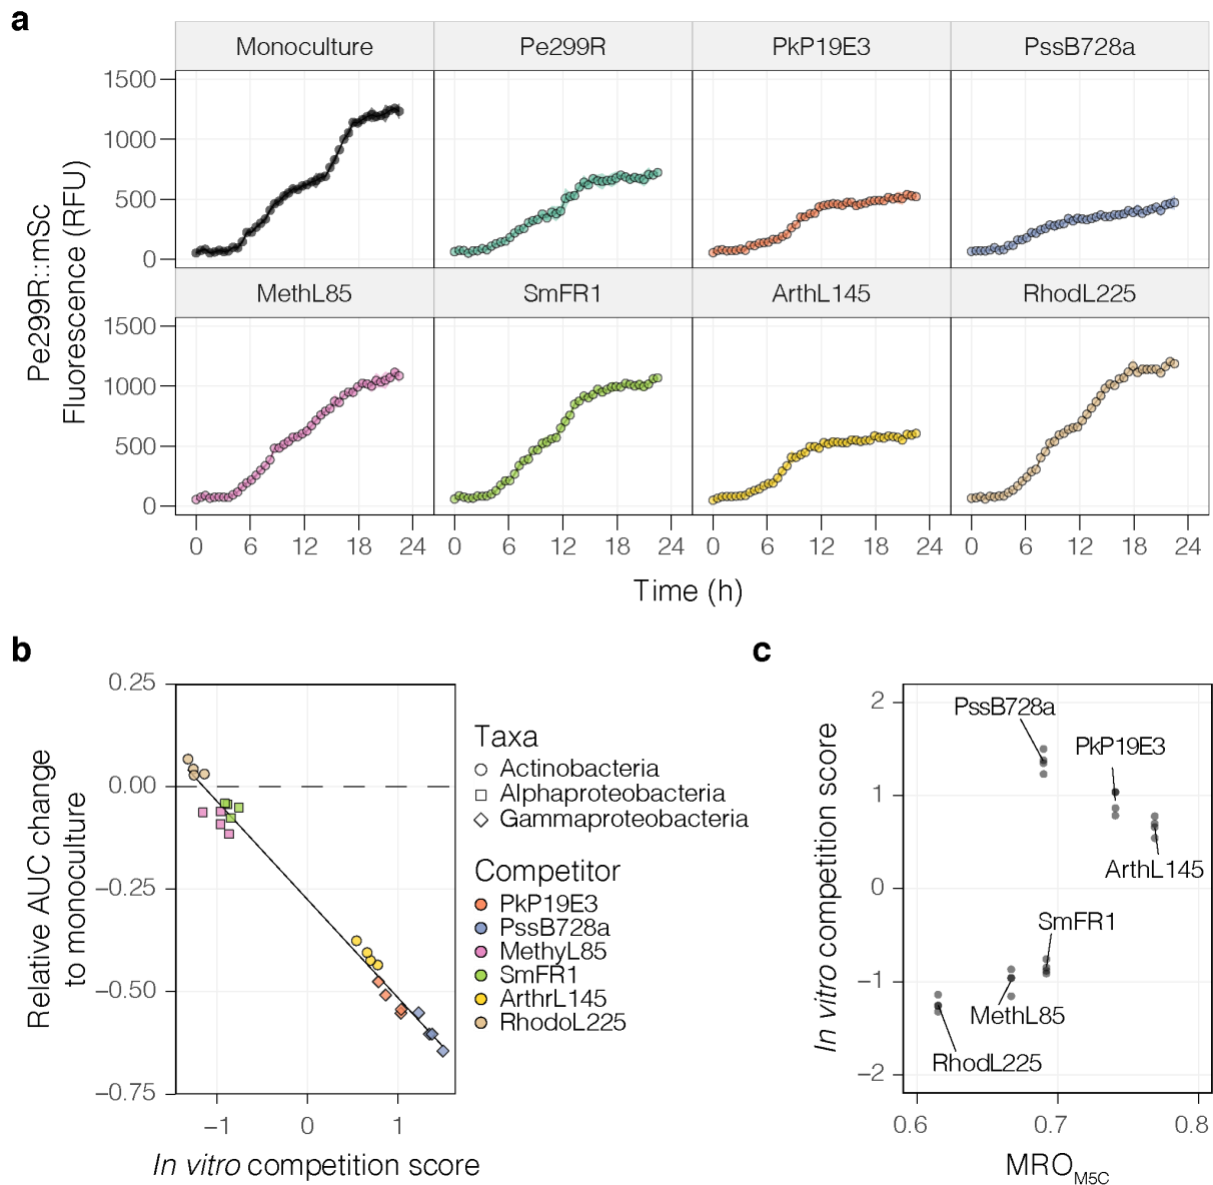

750

751 **Figure 3. Pe299R is affected by the presence of a competitor *in vitro*.** (a) Fluorescence curves of  
 752 Pe299R::mSc co-inoculated with a competitor (top label) in  $MM_{5xC}$ . (b) Relationship between  
 753 competition score (Eq. 1) and the relative change in the area under the fluorescent curve of  
 754 Pe299R::mSc in the presence of a competitor in relation to the monoculture. (c) Relationship between  
 755  $MRO_{M5C}$  and the competitive score of a second epiphyte against Pe299R. Details of the regression  
 756 model can be found in Table S4.

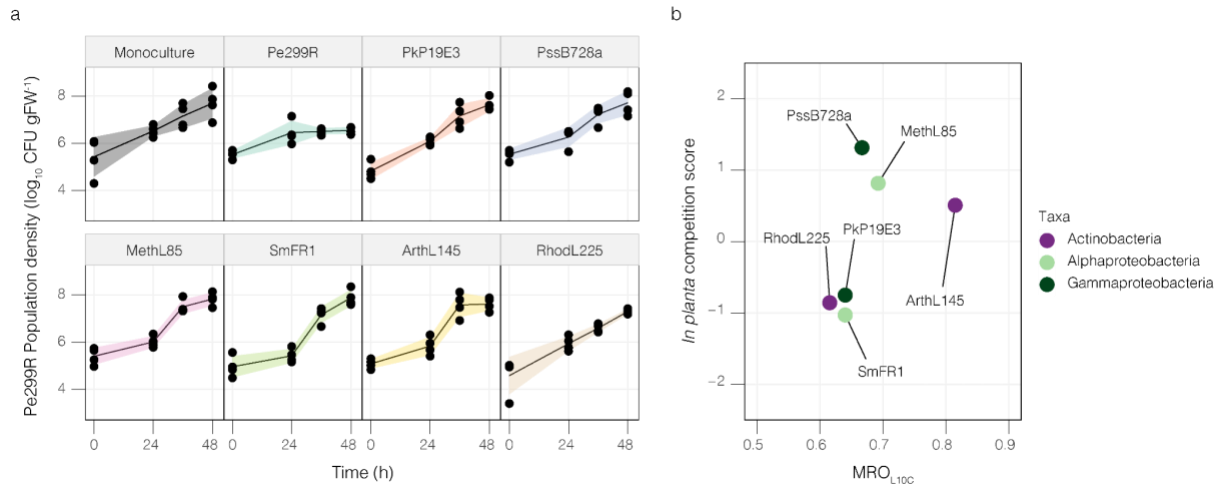

757

758 **Figure 4. Changes of *Pe299R* population density in the phyllosphere. (a)** Population size of *P.*  
759 *eucalypti* 299R::Tn7::mSc::Gm<sup>R</sup>(pProbe\_CUSPER) (*Pe299R*<sub>CUSPER</sub>) on arabidopsis plants as  
760 monoculture or in the presence of a second epiphyte (top label). Each data point represents the CFU  
761 of *Pe299R* per gram of fresh leaf weight (CFU gFW<sup>-1</sup>) of individual plants (n = 4) at different sampling  
762 points (0, 24, 36, and 48 h). Groups were compared using two-way ANOVA, with a significance level of  
763  $\alpha = 0.05$ . **(b)** Relationship between resource overlap (MRO<sub>L10C</sub>) and the competition score of an epiphyte  
764 against *Pe299R* in the phyllosphere. Details of the regression model can be found in Table S5.

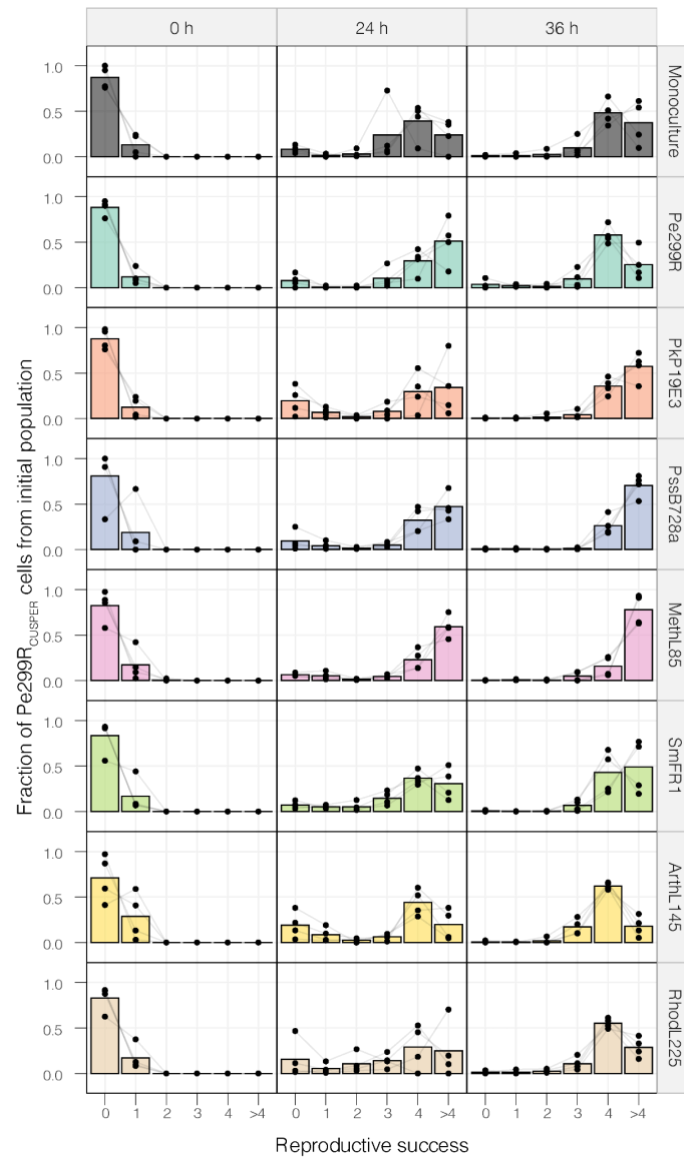

765

766 **Figure 5. Changes in the composition of the Pe299R<sub>CUSPER</sub> populations over time in the presence**  
767 **of a second epiphyte.** Relative fraction of the reproductive success of the founder population to the  
768 observed Pe299R<sub>CUSPER</sub> population at each sampling time point (0, 24, and 36 hpi) as monoculture or  
769 in the presence of a second epiphyte. The relative fractions of each biological replicate are shown and  
770 connected with a grey line. The bar represents the mean relative fraction for all replicates.

771 **TABLES**

772 **Table 1.** Phyllosphere-associated bacterial strains.

| Phylum         | Phylogroup          | PD    | Species                                               | Abbr.    |
|----------------|---------------------|-------|-------------------------------------------------------|----------|
| Pseudomonadota | Gammaproteobacteria | n. a. | <i>Pantoea eucalypti</i> 299R                         | Pe299R   |
|                |                     | 0.41  | <i>Pseudomonas koreensis</i> P19E3                    | PkP19E3  |
|                |                     |       | <i>Pseudomonas syringae</i> pv. <i>syringae</i> B728a | PssB728a |
|                | Alphaproteobacteria | 0.68  | <i>Methylobacterium</i> sp. Leaf85                    | MethL85  |
|                |                     |       | <i>Sphingomonas melonis</i> FR1                       | SmFR1    |
| Actinomycetota | Actinobacteria      | 0.76  | <i>Arthrobacter</i> sp. Leaf145                       | ArthL145 |
|                |                     |       | <i>Rhodococcus</i> sp. Leaf225                        | RhodL225 |

Phylogenetic distances (PD), Carbon profile dissimilarities and MRO are in relation to Pe299R. N.a.: Not applicable

773

774 **Table 2.** Dissimilarity metrics and competition scores of phyllosphere-associated strains in relation to  
 775 Pe299R.

| Strain   | <i>in vitro</i>              |                    |                   | <i>in planta</i>   |                     |                     |                     |                     |                   |
|----------|------------------------------|--------------------|-------------------|--------------------|---------------------|---------------------|---------------------|---------------------|-------------------|
|          | Carbon profile dissimilarity | MRO <sub>MSC</sub> | Competition score | MRO <sub>L8C</sub> | MRO <sub>L10C</sub> | MRO <sub>L19C</sub> | MRO <sub>L18C</sub> | MRO <sub>L26C</sub> | Competition score |
| PkP19E3  | 1.89                         | 0.74               | 2.64              | 0.64               | 0.64                | 0.64                | 0.64                | 0.69                | -0.75             |
| PssB728a | 4.02                         | 0.69               | 3.03              | 0.59               | 0.67                | 0.59                | 0.59                | 0.77                | 1.31              |
| MethL85  | 6.52                         | 0.67               | 0.92              | 0.69               | 0.69                | 0.62                | 0.69                | 0.69                | 0.81              |
| SmFR1    | 3.45                         | 0.69               | 1.05              | 0.64               | 0.64                | 0.62                | 0.62                | 0.88                | -1.03             |
| ArthL145 | 1.75                         | 0.77               | 2.41              | 0.69               | 0.81                | 0.85                | 0.81                | 0.81                | 0.51              |
| RhodL225 | 5.22                         | 0.62               | 0.69              | 0.69               | 0.62                | 0.69                | 0.69                | 0.77                | -0.86             |

Carbon profile dissimilarities and MRO are in relation to Pe299R

776
